# Supplementary material
Source: publisher figshare collection journal article supplement (https://acs.figshare.com/ndownloader/files/5887194)
Supplement: Supplementary file 1 [file 5887194]

# ORGANOMETALLICS

Organometallics, 1996, 15(5), 1331-1333, DOI: [10.1021/om950696i](https://doi.org/10.1021/om950696i)

## Terms & Conditions

Electronic Supporting Information files are available without a subscription to ACS Web Editions. The American Chemical Society holds a copyright ownership interest in any copyrightable Supporting Information. Files available from the ACS website may be downloaded for personal use only. Users are not otherwise permitted to reproduce, republish, redistribute, or sell any Supporting Information from the ACS website, either in whole or in part, in either machine-readable form or any other form without permission from the American Chemical Society. For permission to reproduce, republish and redistribute this material, requesters must process their own requests via the RightsLink permission system. Information about how to use the RightsLink permission system can be found at <http://pubs.acs.org/page/copyright/permissions.html>

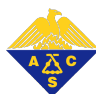

ACS Publications

MOST TRUSTED. MOST CITED. MOST READ.

Copyright © 1996 American Chemical Society

L1333-1

## Experimental Data

All reactions were done under nitrogen a  $N_2$  atmosphere using standard air-sensitive techniques in a Vacuum Atmospheres glovebox unless otherwise stated. Anhydrous ether and hexane were distilled from Na/benzophenone. Methylene chloride, acetonitrile, and nitromethane were distilled from  $CaH_2$ . Deuterated chloroform was distilled from  $CaH_2$  and dried over molecular sieves. NMR spectra were recorded on a Varian Unity-400 spectrometer. IR spectra were recorded on a Perkin-Elmer 1600 series FTIR. Mass spectra were recorded on a VG ZAB-SE (FAB). All analyses were performed by the University of Illinois microanalytical service.

**Preparation of  $[PPh_4][Ru(N)Me_3Br]$ .** One equivalent of  $C_5H_5N \cdot HBr$  (0.017 g, 0.097 mmol) was added all at once to a magnetically stirring yellow solution of  $[PPh_4][Ru(N)Me_4]$  (0.050 g, 0.097 mmol) in 15 mL of  $CH_2Cl_2$ . Vigorous gas evolution occurred immediately followed by a color change from yellow to light brown. After 2h, the solvent was removed from the solution under vacuum. The dull brown residue was crystallized from hexane/ $CH_2Cl_2$  at  $-30^\circ C$  to yield dark orange crystals (0.053 g, 0.092 mmol, 94%).  $^1H$  NMR (400 MHz,  $CDCl_3$ ,  $20.5^\circ C$ ):  $\delta$  7.92 (m, 4 H, *p*- $PC_6H_5$ ), 7.77 (m, 8 H, *o*- $PC_6H_5$ ), 7.60 (m, 8 H, *m*- $PC_6H_5$ ), 1.36 (s, 3 H, *trans*- $RuCH_3$ ), 1.20 (s, 6 H, *cis*- $RuCH_3$ ). IR (KBr pellet,  $cm^{-1}$ ): 3064-2874 (s,  $\nu_{CH}$ ), 1586 (m,  $\nu_{C=C}$ ), 1483 (s,  $\delta_{CH}$ ), 1440 (vs,  $\nu_{C=C}$ ), 1080 (vs,  $\nu_{RuN}$ ), 724 (vs,  $\delta_{CH}$ ), 687 (vs,  $\delta_{oopCH}$ ), 527 (vs,  $\delta_{oopCH}$ ). Anal. Calcd. for  $RuC_{27}H_{29}NPBr$ : C, 55.96; H, 5.04; N, 2.42. Found: C, 55.79; H, 4.80; N, 2.32.

**Synthesis of  $[PPh_4][Ru(N)Me_3SSiMe_3]$ , **1**.** To a magnetically stirred orange solution of  $[P(C_6H_5)_4][Ru(N)Me_3Br]$  (0.020 g, 0.035 mmol) in 20 mL of  $CH_2Cl_2$  1.5 equivalents of  $NaSSiMe_3$  (0.006 g, 0.049 mmol) were added all at once. The suspension of  $NaSSiMe_3$  and **2** was stirred for 30 min, after which the solvent was removed under vacuum. A 1:1 mixture of ether and  $CH_2Cl_2$  was added to the brown residue and the resulting mixture cooled to  $-30^\circ C$  for 20 min. The mixture was filtered to yield a bright orange solution. Hexane was added slowly to the solution and the product was crystallized at  $-30^\circ C$  to form bright orange crystals (0.013 g, 0.021 mmol, 61 %).  $^1H$  NMR (400 MHz,  $CDCl_3$ ,  $20.5^\circ C$ ):  $\delta$  7.92 (m, 4 H, *p*- $PC_6H_5$ ), 7.77 (m, 8 H, *o*- $PC_6H_5$ ), 7.60 (m, 8 H, *m*- $PC_6H_5$ ), 1.05 (s, 6 H, *cis*- $RuCH_3$ ), 1.04 (s, 3 H, *trans*- $RuCH_3$ ), 0.35 (s, 9 H,  $RuSSi(CH_3)_3$ ).  $^{13}C\{^1H\}$  (100 MHz,  $CDCl_3$ ,  $20.3^\circ C$ ): 135.80 (d,  $J = 3.0$  Hz, *p*- $PC_6H_5$ ), 134.35 (d,  $J = 10.6$  Hz, *o*- $PC_6H_5$ ), 130.79 (d,  $J = 12.1$  Hz, *m*- $PC_6H_5$ ), 117.42 (d,  $J = 89.5$  Hz, *ipso*- $PC_6H_5$ ), 9.87 (s, *cis*- $RuCH_3$ ), 8.10 (s, *trans*- $RuCH_3$ ), 6.03 (s,  $RuSSi(CH_3)_3$ ). IR (KBr pellet,  $cm^{-1}$ ): 3046-2877 (s,  $\nu_{CH}$ ), 1576 (m,  $\nu_{C=C}$ ), 1484 (s,  $\delta_{CH}$ ), 1436 (vs,  $\nu_{C=C}$ ), 1236 (s,  $\delta_{SiC}$ ), 1074 (vs,  $\nu_{RuN}$ ), 834 (s,  $\nu_{SiC}$ ), 723 (vs,  $\delta_{CH}$ ), 688 (vs,  $\delta_{oopCH}$ ), 527 (vs,  $\delta_{oopCH}$ ). Anal. Calcd. for  $RuC_{30}H_{38}NPSSi$ : C, 59.49; H, 6.33; N, 2.31, S, 5.28, Si, 4.62. Found: C, 59.24; H, 6.21; N, 2.54, S, 5.08; Si, 4.44.

L1333-2

**Synthesis of [PPh<sub>4</sub>][Ru(N)Me<sub>3</sub>(SH)], 2. Method A:** A solution of 1 (0.005 g, 0.008 mmol) was added to a suspension of 1 equivalent of CsF (0.001 g, 0.008 mmol) in 25 mL of CH<sub>3</sub>NO<sub>2</sub> and the mixture was magnetically stirred at room temperature. The color of the solution slowly turned from orange to yellow. After 12 h, the solvent was removed under vacuum and the dull yellow residue was extracted with a 2:1 mixture of CH<sub>2</sub>Cl<sub>2</sub>/ether and filtered to yield a bright yellow solution. Hexane was added to the solution and the product was crystallized at -30° C to yield yellow needle-like crystals (0.003 g, 0.006 mmol, 75%). **Method B:** To a solution of [PPh<sub>4</sub>][Ru(N)Me<sub>3</sub>Br] (0.012 g, 0.021 mmol) in 20 mL of THF an excess of NaSH (0.002 g, 0.036 mmol) was added all at once. The cloudy orange solution was stirred for 12 h at room temperature. The solvent was then removed under vacuum and the dull yellow residue was extracted with a 2:1 mixture of CH<sub>2</sub>Cl<sub>2</sub>/ether and filtered to yield a bright yellow solution. Hexane was added to the solution and the product was crystallized at -30° C to yield yellow needle-like crystals (0.009 g, 0.017 mmol, 82 %). <sup>1</sup>H NMR (400 MHz, CDCl<sub>3</sub>, 20.5 °C): δ 7.92 (m, 4 H, p-PC<sub>6</sub>H<sub>5</sub>), 7.77 (m, 8 H, o-PC<sub>6</sub>H<sub>5</sub>), 7.60 (m, 8 H, m-PC<sub>6</sub>H<sub>5</sub>), 1.02 (s, 3 H, *trans*-RuCH<sub>3</sub>), 0.94 (s, 6 H, *cis*-RuCH<sub>3</sub>), -0.64 (s, 1 H, RuSH). <sup>13</sup>C{<sup>1</sup>H} (100 MHz, CDCl<sub>3</sub>, 20.3 °C): 135.80 (d, J = 3.0 Hz, p-PC<sub>6</sub>H<sub>5</sub>), 134.35 (d, J = 10.6 Hz, o-PC<sub>6</sub>H<sub>5</sub>), 130.79 (d, J = 12.1 Hz, m-PC<sub>6</sub>H<sub>5</sub>), 117.42 (d, J = 89.5 Hz, *ipso*-PC<sub>6</sub>H<sub>5</sub>), 8.32 (s, *cis*-RuCH<sub>3</sub>), 6.23 (s, *trans*-RuCH<sub>3</sub>). IR (KBr pellet, cm<sup>-1</sup>): 3059-2870 (s, ν<sub>CH</sub>), 2521 (m, ν<sub>SH</sub>), 1577 (m, ν<sub>C=C</sub>), 1483 (s, δ<sub>CH</sub>), 1437 (vs, ν<sub>C=C</sub>), 1073 (vs, ν<sub>RuN</sub>), 756 (vs, δ<sub>CH</sub>), 689 (vs, δ<sub>oopCH</sub>), 527 (vs, δ<sub>oopCH</sub>). Anal. Calcd. for RuC<sub>27</sub>H<sub>30</sub>NPS: C, 60.78; H, 5.67; N, 2.63. Found: C, 60.38; H, 5.68; N, 2.77.

**D<sub>2</sub>O Proton-Deuterium Exchange Studies of 2.** In an NMR tube a sample of 2 was dissolved in CDCl<sub>3</sub>. A <sup>1</sup>H NMR spectrum was obtained of the sample. An excess of D<sub>2</sub>O (5 μL) was syringed into the NMR tube and the sample was shaken vigorously for 1 min. <sup>1</sup>H NMR spectra of the sample were taken at 10 min intervals for 40 min after the addition of D<sub>2</sub>O. The resonance at δ -0.64 ppm assigned to the S-H proton became progressively smaller with respect to the other resonances over 40 min. After 12 h the <sup>1</sup>H NMR spectrum revealed the complete disappearance of the S-H resonance. The IR spectrum also confirmed the disappearance of the resonance at 2521 cm<sup>-1</sup> assigned to the S-H stretch and revealed a new resonance at 1830 cm<sup>-1</sup> for the S-D resonance.

**Synthesis of [PPh<sub>4</sub>][(Me<sub>3</sub>SiCH<sub>2</sub>)<sub>2</sub>(NCMe)(N)Os(μ-S)Ru(N)Me<sub>3</sub>], 3.** To an orange solution of 3 (0.008 g, 0.012 mmol) in 15 mL of CH<sub>2</sub>Cl<sub>2</sub> 1/2 equivalent of [Os(N)(CH<sub>2</sub>SiMe<sub>3</sub>)<sub>2</sub>(μ-Cl)]<sub>2</sub> (0.005 g, 0.006 mmol) was added all at once. The orange solution was immediately cooled to -30 °C. After 12 h at -30 °C, the solution had turned dark orange and the solvent was removed under vacuum and the resulting dark orange residue was extracted with ether and filtered to yield a yellow solution. An excess of hexane was added to the solution and the ether was removed under vacuum to leave yellow precipitates in the remaining hexane. The

L13333

yellow solids were filtered off and redissolved in ether and dried to yield yellow solids (0.007 g, 0.007 mmol, 58%).  $^1\text{H}$  NMR (400 MHz,  $\text{CDCl}_3$ , 20.5  $^\circ\text{C}$ ):  $\delta$  7.92 (m, 4 H, p- $\text{PC}_6\text{H}_5$ ), 7.77 (m, 8 H, o- $\text{PC}_6\text{H}_5$ ), 7.60 (m, 8 H, m- $\text{PC}_6\text{H}_5$ ), 3.58 (d,  $J = 9.0$  Hz, 2 H,  $\text{OsCH}^a\text{H}^b$ ), 2.75 (d,  $J = 9.0$  Hz, 2 H,  $\text{OsCH}^a\text{H}^b$ ), 2.49 (d,  $J = 10.2$  Hz, 2 H,  $\text{OsCH}^c\text{H}^d$ ), 2.42 (d,  $J = 10.2$  Hz, 2 H,  $\text{OsCH}^c\text{H}^d$ ), 2.12 (s, 3 H,  $\text{OsNCCCH}_3$ ), 1.08 (s, 3 H, *trans*- $\text{RuCH}_3$ ), 0.97 (s, 6 H, *cis*- $\text{RuCH}_3$ ), 0.09 (s, 9 H,  $\text{OsCH}_2\text{Si}(\text{CH}_3)_3$ ), -0.01 (s, 9 H,  $\text{OsCH}_2\text{Si}(\text{CH}_3)_3$ ). IR (KBr pellet,  $\text{cm}^{-1}$ ): 2942-2868 (s,  $\nu_{\text{CH}}$ ), 2317 (w,  $\nu_{\text{CN}}$ ), 1603 (m,  $\nu_{\text{C}=\text{C}}$ ), 1448 (s,  $\delta_{\text{CH}}$ ), 1436 (vs,  $\nu_{\text{C}=\text{C}}$ ), 1261 (s,  $\delta_{\text{SiC}}$ ), 1240 (s,  $\delta_{\text{SiC}}$ ), 1108 (s,  $\nu_{\text{OsN}}$ ), 1073 (s,  $\nu_{\text{RuN}}$ ), 850 (s,  $\nu_{\text{SiC}}$ ), 829 (s,  $\nu_{\text{SiC}}$ ), 750 (vs,  $\delta_{\text{CH}}$ ), 689 (vs,  $\delta_{\text{oopCH}}$ ). Mass spectrum (FAB, 3-NBA and magic bullet, neg. ion,  $m/z$ ): 614 ( $\text{M}^-$ ,  $\text{Ru}(\text{N})\text{Me}_3\text{R}(\mu\text{-S})\text{Os}(\text{N})(\text{CH}_2\text{SiMe}_3)_2\text{NCMe}$ ).

### Crystal data and structure refinement summary for 2.

The prismatic, yellow, translucent cluster data crystal was cut from a cluster and mounted using oil (Paratone-N, Exxon) to a thin glass fiber with the (2 4 -3) scattering planes roughly normal to the spindle axis. There were some crystallites attached to the surface of the crystal. The data crystal was bound by the (1 1 0), (-1 -1 0), (1 -1 -1), (-1 1 1), (0 0 1) and (0 0 -1) faces. Distances from the crystal center to these facial boundaries were 0.05, 0.05, 0.07, 0.07, 0.19, 0.19, 0.21 and 0.21 nm, respectively. Data were measured at 198 K on an Enraf-Nonnius CAD4 diffractometer. Systematic conditions suggested the ambiguous space group  $\text{P4/n}$ ; refinement confirmed the presence of a symmetry center. Periodically monitored standard intensities showed no decay. Step-scanned intensity data were reduced by profile analysis and corrected for Lorentz-polarization effects and for absorption. Scattering factors and anomalous dispersion terms were taken from standard tables.

The structure was solved by direct methods; correct positions for Ru and non-H anion atoms were deduced from an E-map. One cycle of isotropic least-squares refinement followed by an unweighted difference Fourier synthesis revealed positions for remaining non-H atoms including disordered positions for atoms C1 and S. Crystallographic 4-fold symmetry was imposed on the anion and 4-bar symmetry was imposed on the cation. The sulfhydryl H atom was independently refined. Methyl H atom positions,  $\text{Ru-CH}_3$ , were optimized by rotation about Ru-C bonds with idealized C-H, Ru-H and H-H distances. Remaining H atoms were included as fixed idealized contributors. H atom U's were assigned as 1.2 times  $U_{\text{eq}}$  of adjacent non-H atoms. Non-H atoms were refined with anisotropic thermal coefficients. Successful convergence of the full-matrix least-squares refinement on  $F^2$  was indicated by the maximum shift/error for the last cycle. The final difference Fourier map had no significant features. A final analysis of variance

L13334

between observed and calculated structure factors showed no dependence on amplitude or resolution.

The proposed model was refined without restraints. Bond length for Ru-C(1) and Ru-S reflect a correlation between disordered positions for atom C(1) and S. The Ru-S bond length is slightly shortened by this correlation and conversely, the Ru-C(1) bond length is slightly lengthened.

**Table 1.** Crystal Data Collection and Refinement Parameters for **2**

|                                                         |                                                                                                                           |
|---------------------------------------------------------|---------------------------------------------------------------------------------------------------------------------------|
| Compound                                                | <b>2</b>                                                                                                                  |
| Formula                                                 | C <sub>27</sub> H <sub>30</sub> NPRuS                                                                                     |
| Formula weight                                          | 532.62                                                                                                                    |
| Space Group                                             | P4/n                                                                                                                      |
| a, Å                                                    | 13.267(2)                                                                                                                 |
| b, Å                                                    | 13.267(2)                                                                                                                 |
| c, Å                                                    | 7.210(2)                                                                                                                  |
| $\alpha = \gamma$ , deg                                 | 90                                                                                                                        |
| $\beta$ , deg                                           | 90                                                                                                                        |
| Formula/Unit cell, Z                                    | 2                                                                                                                         |
| Density calculated ( $\rho$ ) gm/cm <sup>3</sup>        | 1.394                                                                                                                     |
| Temperature, K                                          | 198 (2)                                                                                                                   |
| Radiation                                               | Mo K $\alpha$ (graphite crystal monochromator)<br>K $\alpha_1$ = 0.70930, K $\alpha_2$ = 0.71359<br>K $\alpha$ =0.71071 Å |
| Absorption Coeff.( $\mu$ ), mm <sup>-1</sup>            | 0.777                                                                                                                     |
| $R = \sum   F_o  -  F_c   / \sum  F_o $                 | 0.0328                                                                                                                    |
| $R_w = (\sum w( F_o  -  F_c )^2 / \sum w F_o ^2)^{1/2}$ | 0.0482                                                                                                                    |
| Max. and min. transmission                              | 0.922 and 0.894                                                                                                           |
| Index Ranges                                            | 0 $\leq h \leq 15$ , 0 $\leq k \leq 15$ , -8 $\leq l \leq 0$                                                              |
| Reflections collected                                   | 1221                                                                                                                      |
| Independent reflections                                 | 1120 [R(int) = 0.0392]                                                                                                    |
| F(000)                                                  | 548                                                                                                                       |
| dimensions, mm                                          | 0.42 x 0.14 x 0.10                                                                                                        |

L1333-5

**Table 2.** Selected Bond Lengths (Å) for **2**

|            |          |            |          |
|------------|----------|------------|----------|
| Ru-N       | 1.595(6) | Ru-C(l)#1  | 2.19(2)  |
| Ru-C(l)    | 2.19(2)  | Ru-C(1)#2  | 2.19(2)  |
| Ru-C(1)#3  | 2.19(2)  | Ru-S       | 2.26(2)  |
| Ru-S#1     | 2.26(2)  | S-H        | 1.1(2)   |
| C(l)-H(lA) | 0.98     | C(l)-H(lB) | 0.98     |
| C(l)-H(lC) | 0.98     | P-C(4)     | 1.795(3) |
| P-C(4)#4   | 1.795(3) | P-C(4)#5   | 1.795(3) |
| P-C(4)#6   | 1.795(3) | C(4)-C(9)  | 1.388(5) |
| C(5)-C(6)  | 1.373(5) | C(5)-H(5)  | 0.95     |
| C(6)-C(7)  | 1.385(6) | C(6)-H(6)  | 0.95     |
| C(7)-C(8)  | 1.374(6) | C(7)-H(7)  | 0.95     |
| C(8)-C(9)  | 1.378(5) | C(8)-H(8)  | 0.95     |

**Table 3.** Selected Bond Angles (deg) for **2**

|                  |            |                  |            |
|------------------|------------|------------------|------------|
| N-Ru-C(l)        | 109.1(5)   | C(l)#1-Ru-C(l)   | 83.8(3)    |
| N-Ru-C(1)#2      | 109.1(5)   | C(l)#1-Ru-C(1)#2 | 83.8(3)    |
| C(l)-Ru-C(1)#2   | 141.7(10)  | N-Ru-C(1)#3      | 109.1(5)   |
| C(l)#1-Ru-C(1)#3 | 141.7(10)  | C(l)-Ru-C(1)#3   | 83.8(3)    |
| C(1)#2-Ru-C(1)#3 | 83.8(3)    | N-Ru-S           | 105.6(4)   |
| C(l)#1-Ru-S      | 86.8(10)   | C(l)-Ru-S        | 4.0(10)    |
| C(1)#2-Ru-S      | 145.2(2)   | C(1)#3-Ru-S      | 83.1(10)   |
| N-Ru-S#1         | 105.6(4)   | C(l)#1-Ru-S#1    | 4.0(10)    |
| C(l)-Ru-S#1      | 83.1(10)   | C(1)#2-Ru-S#1    | 86.8(10)   |
| C(1)#3-Ru-S#1    | 145.2(2)   | S-Ru-S#1         | 85.9(2)    |
| Ru-S-H           | 100(10)    | Ru-C(l)-H        | 106(10)    |
| Ru-C(l)-H(lA)    | 109.5(5)   | H-C(l)-H(lA)     | 84(10)     |
| Ru-C(l)-H(lB)    | 109.5(5)   | H-C(l)-H(lB)     | 30(10)     |
| H(lA)-C(l)-H(lB) | 109.5      | Ru-C(l)-H(lC)    | 109.5(6)   |
| H(lA)-C(l)-H(lC) | 109.5      | R(lB)-C(l)-H(lC) | 109.5      |
| C(4)-P-C(4)#4    | 107.2(2)   | C(4)-P-C(4)#5    | 110.63(10) |
| C(4)#4-P-C(4)#5  | 110.63(10) | C(4)-P-C(4)#6    | 110.62(10) |
| C(4)#4-P-C(4)#6  | 110.63(10) | C(4)#5-P-C(4)#6  | 107.2(2)   |

L1333-6

|                |          |                |          |
|----------------|----------|----------------|----------|
| C(9)-C(4)-C(5) | 120.4(3) | C(9)-C(4)-P    | 121.4(2) |
| C(5)-C(4)-P    | 118.2(2) | C(6)-C(5)-C(4) | 119.7(3) |
| C(6)-C(5)-H(5) | 120.2(2) | C(4)-C(5)-H(5) | 120.2(2) |
| C(5)-C(6)-C(7) | 120.0(3) | C(5)-C(6)-H(6) | 120.0(2) |
| C(7)-C(6)-H(6) | 120.0(2) | C(8)-C(7)-C(6) | 120.0(3) |
| C(8)-C(7)-H(7) | 120.0(2) | C(6)-C(7)-H(7) | 120.0(2) |
| C(7)-C(8)-C(9) | 121.1(4) | C(7)-C(8)-H(8) | 119.5(2) |
| C(9)-C(8)-H(8) | 119.5(2) | C(8)-C(9)-C(4) | 118.8(3) |
| C(8)-C(9)-H(9) | 120.6(2) | C(4)-C(9)-H(9) | 120.6(2) |

**Table 4.**

Atomic coordinates ( $\times 10^4$ ) and equivalent isotropic displacement parameters ( $\text{\AA}^2 \times 10^3$ ) for **2**  
(U(eq) is defined as one third of the trace of the orthogonalized  $U_{ij}$  tensor)

|       | x         | y        | z         | U(eq) |
|-------|-----------|----------|-----------|-------|
| Ru    | 2500      | 2500     | 2334(1)   | 31(1) |
| S     | 3226(15)  | 1027(14) | 1490(22)  | 64(5) |
| C(l)  | 3141(17)  | 1076(14) | 1337(24)  | 52(5) |
| N     | 2500      | 2500     | 4546(8)   | 46(2) |
| P     | 7500      | 2500     | 0         | 24(1) |
| C(4)  | 7730(2)   | 1436(2)  | 1478(4)   | 28(1) |
| C(5)  | 7030(3)   | 1223(3)  | 2864(4)   | 36(1) |
| C(6)  | 7188(3)   | 420(3)   | 4030(5)   | 45(1) |
| C(7)  | 8047(3)   | -165(3)  | 3843(5)   | 50(1) |
| C(8)  | 8740(3)   | 57(3)    | 2488(5)   | 49(1) |
| C(9)  | 8594(3)   | 854(3)   | 1291(5)   | 35(1) |
| H     | 2565(151) | 572(155) | 1324(286) | 77    |
| H(lA) | 3072(30)  | 1039(17) | -14(23)   | 63    |
| H(lB) | 2781(27)  | 511(14)  | 1908(44)  | 63    |
| H(lC) | 3856(19)  | 1043(21) | 1673(58)  | 63    |
| H(5)  | 6447(3)   | 1631(3)  | 3002(4)   | 43    |
| H(6)  | 6709(3)   | 266(3)   | 4967(5)   | 54    |
| H(7)  | 8156(3)   | -720(3)  | 4651(5)   | 60    |
| H(8)  | 9329(3)   | -344(3)  | 2375(5)   | 59    |
| H(9)  | 9075(3)   | 1003(3)  | 356(5)    | 42    |

L1333-7

**Table 5.** Anisotropic displacement parameters for **2**.

|      | <u>U11</u> | <u>U22</u> | <u>U33</u> | <u>U23</u> | <u>U13</u> | <u>U12</u> |
|------|------------|------------|------------|------------|------------|------------|
| Ru   | 30(1)      | 30(1)      | 33(1)      | 0          | 0          | 0          |
| S    | 83(9)      | 57(7)      | 52(5)      | 11(5)      | 24(5)      | 7(5)       |
| C(1) | 56(8)      | 39(8)      | 61(9)      | -26(6)     | 1(6)       | 2(6)       |
| N    | 54(2)      | 54(2)      | 30(3)      | 0          | 0          | 0          |
| P    | 24(1)      | 24(1)      | 23(1)      | 0          | 0          | 0          |
| C(4) | 37(2)      | 23(2)      | 24(2)      | 0(1)       | -7(1)      | -5(1)      |
| C(5) | 38(2)      | 39(2)      | 31(2)      | -2(2)      | 1(1)       | -5(1)      |
| C(6) | 60(2)      | 45(2)      | 30(2)      | 7(2)       | 0(2)       | -20(2)     |
| C(7) | 81(3)      | 29(2)      | 41(2)      | 12(2)      | -13(2)     | -11(2)     |
| C(8) | 67(3)      | 33(2)      | 46(2)      | 4(2)       | -10(2)     | 14(2)      |
| C(9) | 40(2)      | 33(2)      | 32(2)      | 1(1)       | -2(1)      | 3(2)       |
